# Supplementary material
Source: PubMed Central journal article supplement (PMC7229751)

## Supporting Information Appendix.

Montgomery, R.A., K.E. Rice, A. Stefanski, R. L. Rich and P. B. Reich. Phenological responses of temperate and boreal trees to warming depend on ambient spring temperatures, leaf habit and geographic range.

### SI Appendix: Tables

**Table S1.** Mixed-effects model results for day of year that juvenile trees broke bud. Random effects of site, plot and seedling cohort not shown. The model with all five years doesn't include *Populus tremuloides* or *Pinus banksiana* due to inadequate sample size in 2013. Significant effects involving the warming treatment (heat) are in bold.

| Source  | 2009-2012 all species |                   |       |        | 2009-2013 (8 species) |                   |       |        |
|---------|-----------------------|-------------------|-------|--------|-----------------------|-------------------|-------|--------|
|         | df                    | df <sub>den</sub> | F     | P      | df                    | df <sub>den</sub> | F     | P      |
| Year    | 3                     | 3603              | 4551  | <.0001 | 4                     | 541               | 2576  | <.0001 |
| Habitat | 1                     | 11                | 1.628 | 0.2291 | 1                     | 11                | 2.493 | 0.1425 |

|                            |           |             |              |                  |           |             |              |                  |
|----------------------------|-----------|-------------|--------------|------------------|-----------|-------------|--------------|------------------|
| <b>Heat treatment</b>      | <b>2</b>  | <b>75</b>   | <b>150.1</b> | <b>&lt;.0001</b> | <b>2</b>  | <b>76</b>   | <b>97.29</b> | <b>&lt;.0001</b> |
| Species                    | 9         | 5271        | 757.5        | <.0001           | 7         | 5019        | 542.6        | <.0001           |
| Year*Habitat               | 3         | 3638        | 12.44        | <.0001           | 4         | 2550        | 5.985        | <.0001           |
| <b>Year*Heat treatment</b> | <b>6</b>  | <b>3748</b> | <b>11.18</b> | <b>&lt;.0001</b> | <b>8</b>  | <b>3996</b> | <b>13.63</b> | <b>&lt;.0001</b> |
| Year*Species               | 27        | 5271        | 105.6        | <.0001           | 28        | 5018        | 99.86        | <.0001           |
| Habitat*Heat               | 2         | 74.8        | 1.816        | 0.1698           | 2         | 76          | 0.7697       | 0.4667           |
| Habitat*Species            | 9         | 5270        | 5.473        | <.0001           | 7         | 5017        | 5.616        | <.0001           |
| <b>Heat *Species</b>       | <b>18</b> | <b>5272</b> | <b>6.587</b> | <b>&lt;.0001</b> | <b>14</b> | <b>5022</b> | <b>3.785</b> | <b>&lt;.0001</b> |
| <b>Year*Habitat*Heat</b>   | <b>6</b>  | <b>3748</b> | <b>4.792</b> | <b>&lt;.0001</b> | <b>8</b>  | <b>3996</b> | <b>4.308</b> | <b>&lt;.0001</b> |
| Year*Habitat*Species       | 27        | 5270        | 3.058        | <.0001           | 28        | 5016        | 2.591        | <.0001           |
| <b>Year*Heat*Species</b>   | <b>54</b> | <b>5272</b> | <b>2.676</b> | <b>&lt;.0001</b> | <b>56</b> | <b>5021</b> | <b>1.403</b> | <b>0.0259</b>    |
| Habitat*Heat*Species       | 18        | 5272        | 0.9076       | 0.5690           | 14        | 5022        | 0.6517       | 0.8228           |

**Table S2.** Mixed-effects model results for growing degree days (base temperature of 4°C) accumulated on the date juvenile trees broke bud. Random effects of site, plot and seedling cohort not shown. The model with all five years doesn't include *Populus tremuloides* or *Pinus banksiana* due to inadequate sample size in 2013. Significant effects involving the warming treatment (heat) are in bold.

| Source                     | 2009-2012 all species |                   |              |                  | 2009-2013 (8 species) |                   |              |                  |
|----------------------------|-----------------------|-------------------|--------------|------------------|-----------------------|-------------------|--------------|------------------|
|                            | df                    | df <sub>den</sub> | F            | P                | df                    | df <sub>den</sub> | F            | P                |
|                            |                       |                   | $R^2=0.63$   |                  |                       |                   | $R^2=0.60$   |                  |
| Year                       | 3                     | 3766              | 289.5        | <.0001           | 4                     | 1846              | 181.9        | <.0001           |
| Habitat                    | 1                     | 80                | 10.20        | 0.0020           | 1                     | 84                | 4.13         | 0.0453           |
| <b>Heat treatment</b>      | <b>2</b>              | <b>80</b>         | <b>72.44</b> | <b>&lt;.0001</b> | <b>2</b>              | <b>81</b>         | <b>85.48</b> | <b>&lt;.0001</b> |
| Species                    | 9                     | 5200              | 464.8        | <.0001           | 7                     | 4984              | 388.9        | <.0001           |
| Year*Habitat               | 3                     | 3800              | 21.57        | <.0001           | 4                     | 3479              | 16.58        | <.0001           |
| <b>Year*Heat treatment</b> | <b>6</b>              | <b>3956</b>       | <b>8.478</b> | <b>&lt;.0001</b> | <b>8</b>              | <b>4100</b>       | <b>4.756</b> | <b>&lt;.0001</b> |
| Year*Species               | 27                    | 5200              | 51.86        | <.0001           | 28                    | 4984              | 70.13        | <.0001           |
| Habitat*Heat               | 2                     | 80                | 2.318        | 0.1051           | 2                     | 81                | 1.461        | 0.2380           |
| Habitat*Species            | 9                     | 5199              | 7.021        | <.0001           | 7                     | 4982              | 6.842        | <.0001           |

|                          |           |             |              |                  |           |             |               |                  |
|--------------------------|-----------|-------------|--------------|------------------|-----------|-------------|---------------|------------------|
| <b>Heat *Species</b>     | <b>18</b> | <b>5202</b> | <b>5.500</b> | <b>&lt;.0001</b> | <b>14</b> | <b>4989</b> | <b>4.695</b>  | <b>&lt;.0001</b> |
| <b>Year*Habitat*Heat</b> | <b>6</b>  | <b>3951</b> | <b>2.913</b> | <b>0.0078</b>    | <b>8</b>  | <b>4100</b> | <b>2.788</b>  | <b>0.0045</b>    |
| Year*Habitat*Species     | 27        | 5199        | 3.042        | <.0001           | 28        | 4981        | 2.847         | <.0001           |
| <b>Year*Heat*Species</b> | <b>54</b> | <b>5201</b> | <b>2.218</b> | <b>&lt;.0001</b> | <b>56</b> | <b>4988</b> | <b>1.5655</b> | <b>0.0046</b>    |
| Habitat*Heat*Species     | 18        | 5201        | 0.8758       | 0.6089           | 14        | 4989        | 0.6173        | 0.8531           |

**Table S3.** Mixed-effects model results for day of year that 1/3 of the leaves had senesced in juvenile trees. Random effects of site, plot and seedling cohort not shown. The model with all five years doesn't include *Populus tremuloides* or *Pinus banksiana* due to inadequate sample size in 2013. Significant effects involving the warming treatment (heat) are in bold.

| Source                     | 2009-2012 all species |                   |              |                  | 2009-2013 (8 species) |                   |              |                  |
|----------------------------|-----------------------|-------------------|--------------|------------------|-----------------------|-------------------|--------------|------------------|
|                            | df                    | df <sub>den</sub> | F            | P                | df                    | df <sub>den</sub> | F            | P                |
|                            |                       |                   | $R^2=0.55$   |                  |                       |                   | $R^2=0.55$   |                  |
| Year                       | 3                     | 1874              | 113.4        | <.0001           | 4                     | 18                | 99.42        | <.0001           |
| Habitat                    | 1                     | 10                | 1.060        | 0.3271           | 1                     | 10                | 4.495        | 0.0597           |
| <b>Heat Treatment</b>      | <b>2</b>              | <b>59</b>         | <b>32.60</b> | <b>&lt;.0001</b> | <b>2</b>              | <b>59</b>         | <b>20.76</b> | <b>&lt;.0001</b> |
| Species                    | 9                     | 4541              | 304.1        | <.0001           | 7                     | 4513              | 311.6        | <.0001           |
| Year*Habitat               | 3                     | 1969              | 2.217        | 0.0842           | 4                     | 359               | 1.840        | 0.1207           |
| <b>Year*Heat Treatment</b> | <b>6</b>              | <b>3012</b>       | <b>7.605</b> | <b>&lt;.0001</b> | <b>8</b>              | <b>3408</b>       | <b>5.310</b> | <b>&lt;.0001</b> |
| Year*Species               | 27                    | 4540              | 22.15        | <.0001           | 28                    | 4512              | 37.67        | <.0001           |
| Habitat*Heat               | 2                     | 58                | 0.1467       | 0.8639           | 2                     | 59                | 0.2245       | 0.7996           |
| Habitat*Species            | 9                     | 4541              | 15.50        | <.0001           | 7                     | 4513              | 26.60        | <.0001           |

|                             |           |             |              |                  |           |             |              |                  |
|-----------------------------|-----------|-------------|--------------|------------------|-----------|-------------|--------------|------------------|
| <b>Heat *Species</b>        | <b>18</b> | <b>4543</b> | <b>10.00</b> | <b>&lt;.0001</b> | <b>14</b> | <b>4514</b> | <b>11.66</b> | <b>&lt;.0001</b> |
| Year*Habitat*Heat           | 6         | 3006        | 1.391        | 0.2142           | 8         | 3407        | 1.914        | 0.0537           |
| Year*Habitat*Species        | 27        | 4541        | 1.417        | 0.0747           | 28        | 4512        | 5.911        | <.0001           |
| <b>Year*Heat*Species</b>    | <b>54</b> | <b>4543</b> | <b>1.774</b> | <b>0.0004</b>    | <b>56</b> | <b>4513</b> | <b>1.372</b> | <b>0.0349</b>    |
| <b>Habitat*Heat*Species</b> | <b>18</b> | <b>4541</b> | <b>2.200</b> | <b>0.0025</b>    | <b>14</b> | <b>4513</b> | <b>2.221</b> | <b>0.0055</b>    |

**Table S4.** Mixed-effects model results for growing season length for deciduous species (n=5). Random effects of site, plot and seedling cohort not shown. Significant effects involving the warming treatment (heat) are in bold.

| 2009-2013 (5 species)       |          |                   |              |                  |
|-----------------------------|----------|-------------------|--------------|------------------|
| $R^2=0.69$                  |          |                   |              |                  |
| Source                      | df       | df <sub>den</sub> | F            | P                |
| Year                        | 4        | 180               | 367          | <.0001           |
| Habitat                     | 1        | 10                | 4.863        | 0.0510           |
| <b>Heat Treatment</b>       | <b>2</b> | <b>75</b>         | <b>86.94</b> | <b>&lt;.0001</b> |
| Species                     | 4        | 2710              | 87.22        | <.0001           |
| Year*Habitat                | 4        | 1283              | 3.795        | 0.0045           |
| <b>Year*Heat Treatment</b>  | <b>8</b> | <b>2508</b>       | <b>6.855</b> | <b>&lt;.0001</b> |
| Year*Species                | 16       | 2711              | 57.20        | <.0001           |
| Habitat*Heat                | 2        | 75                | 1.072        | 0.3476           |
| Habitat*Species             | 7        | 2700              | 16.77        | <.0001           |
| <b>Heat *Species</b>        | <b>8</b> | <b>2713</b>       | <b>2.073</b> | <b>0.0352</b>    |
| <b>Year*Habitat*Heat</b>    | <b>8</b> | <b>2507</b>       | <b>2.949</b> | <b>0.0028</b>    |
| Year*Habitat*Species        | 16       | 2712              | 6.051        | <.0001           |
| Year*Heat*Species           | 32       | 2711              | 1.342        | 0.0954           |
| <b>Habitat*Heat*Species</b> | <b>8</b> | <b>2713</b>       | <b>2.609</b> | <b>0.0077</b>    |

**Table S5.** Contribution of earlier budburst versus delayed start of senescence to extension of the growing season in deciduous species grown in +1.7°C and +3.4°C warming.

| Year | Species                    | N  | +1.7°C   |                     | +3.4°C   |                     |
|------|----------------------------|----|----------|---------------------|----------|---------------------|
|      |                            |    | Budburst | Start of Senescence | Budburst | Start of Senescence |
| 2009 | <i>Acer rubrum</i>         | 12 | 21%      | 79%                 | 22%      | 78%                 |
|      | <i>Acer saccharum</i>      | 12 | 42%      | 58%                 | 24%      | 76%                 |
|      | <i>Betula papyrifera</i>   | 12 | 39%      | 61%                 | 38%      | 62%                 |
|      | <i>Populus tremuloides</i> | 12 | 30%      | 70%                 | 23%      | 77%                 |
|      | <i>Quercus macrocarpa</i>  | 12 | 27%      | 73%                 | 42%      | 58%                 |
|      | <i>Quercus rubra</i>       | 12 | 40%      | 60%                 | 53%      | 47%                 |
|      | Mean                       | 6  | 33%      | 66%                 | 33%      | 66%                 |
| 2010 | <i>Acer rubrum</i>         | 12 | 43%      | 57%                 | 47%      | 53%                 |
|      | <i>Acer saccharum</i>      | 12 | 50%      | 50%                 | 50%      | 50%                 |
|      | <i>Betula papyrifera</i>   | 12 | 46%      | 54%                 | 41%      | 59%                 |
|      | <i>Populus tremuloides</i> | 12 | 52%      | 48%                 | 55%      | 45%                 |
|      | <i>Quercus macrocarpa</i>  | 12 | 75%      | 25%                 | 68%      | 32%                 |
|      | <i>Quercus rubra</i>       | 12 | 57%      | 43%                 | 56%      | 44%                 |
|      | Mean                       | 6  | 54%      | 46%                 | 53%      | 47%                 |
| 2011 | <i>Acer rubrum</i>         | 12 | 6%       | 94%                 | 39%      | 61%                 |



|            |                            |    |      |     |      |     |
|------------|----------------------------|----|------|-----|------|-----|
|            | <i>Acer saccharum</i>      | 12 | 14%  | 86% | 32%  | 68% |
|            | <i>Betula papyrifera</i>   | 12 | 39%  | 61% | 27%  | 73% |
|            | <i>Populus tremuloides</i> | 12 | 35%  | 65% | 44%  | 56% |
|            | <i>Quercus macrocarpa</i>  | 12 | 66%  | 34% | 55%  | 45% |
|            | <i>Quercus rubra</i>       | 12 | 42%  | 58% | 47%  | 53% |
| Mean       |                            |    | 34%  | 66% | 41%  | 59% |
| 2012       | <i>Acer rubrum</i>         | 12 | 26%  | 74% | 60%  | 40% |
|            | <i>Acer saccharum</i>      | 12 | 33%  | 67% | 54%  | 46% |
|            | <i>Betula papyrifera</i>   | 12 | 100% | 0%  | 100% | 0%  |
|            | <i>Populus tremuloides</i> | 12 | 84%  | 16% | 100% | 0%  |
|            | <i>Quercus macrocarpa</i>  | 12 | 43%  | 57% | 78%  | 22% |
|            | <i>Quercus rubra</i>       | 12 | 97%  | 3%  | 95%  | 5%  |
| Mean       |                            | 6  | 64%  | 36% | 81%  | 19% |
| 2013       | <i>Acer rubrum</i>         | 12 | 40%  | 60% | 5%   | 95% |
|            | <i>Acer saccharum</i>      | 12 | 16%  | 84% | 19%  | 81% |
|            | <i>Betula papyrifera</i>   | 12 | 6%   | 94% | 28%  | 72% |
|            | <i>Populus tremuloides</i> | 6  | 30%  | 70% | 20%  | 80% |
|            | <i>Quercus macrocarpa</i>  | 12 | 19%  | 81% | 32%  | 68% |
|            | <i>Quercus rubra</i>       | 12 | 28%  | 72% | 32%  | 68% |
| Mean       |                            | 6  | 23%  | 77% | 23%  | 77% |
| Grand Mean |                            | 5  | 42%  | 58% | 46%  | 54% |

**Table S6.** Study species with shade tolerance rankings (Niinemets & Valladares 2006), geographic range center (Reich et al. 2015) and leaf habit.

| <b>Species</b>             | <b>Distribution</b> | <b>Shade tolerance ranking</b> | <b>Mean range center</b> | <b>Leaf habit</b> |
|----------------------------|---------------------|--------------------------------|--------------------------|-------------------|
| <i>Acer rubrum</i>         | temperate           | 3.44±0.23                      | 40.0°N                   | deciduous         |
| <i>Quercus rubra</i>       | temperate           | 2.75±0.18                      | 40.5°N                   | deciduous         |
| <i>Quercus macrocarpa</i>  | temperate           | 2.71±0.27                      | 41.2°N                   | deciduous         |
| <i>Acer saccharum</i>      | temperate           | 4.76±0.11                      | 42.9°N                   | deciduous         |
| <i>Pinus strobus</i>       | temperate           | 3.21±0.20                      | 47.4°N                   | evergreen         |
| <i>Populus tremuloides</i> | boreal              | 1.21±0.18                      | 49.3°N                   | deciduous         |
| <i>Betula papyrifera</i>   | boreal              | 1.54±0.16                      | 50.3°N                   | deciduous         |
| <i>Abies balsamea</i>      | boreal              | 5.01±0.09                      | 50.7°N                   | evergreen         |
| <i>Pinus banksiana</i>     | boreal              | 1.36±0.33                      | 50.9°N                   | evergreen         |
| <i>Picea glauca</i>        | boreal              | 4.15±0.17                      | 52.2°N                   | evergreen         |

*SI Appendix: Figures*

**Figure S1.** (A) Growing degree day accumulation in each year where one growing degree day equals  $(T_{\max} + T_{\min})/2 - T_{\text{base}}$ ,  $T_{\text{base}}$  is 4°C, and if  $(T_{\max} + T_{\min})/2 - T_{\text{base}} < 0$  then GDD=0. (B) Chilling degree day accumulation in autumn ( $\text{CDD} = T_{\text{base}} - (T_{\max} + T_{\min})/2$ ,  $T_{\text{base}}$  is 25°C and if  $T_{\text{base}} - (T_{\max} + T_{\min})/2 < 0$  then CDD=0. Day of year is counted from January 1 as day 1.

(A)

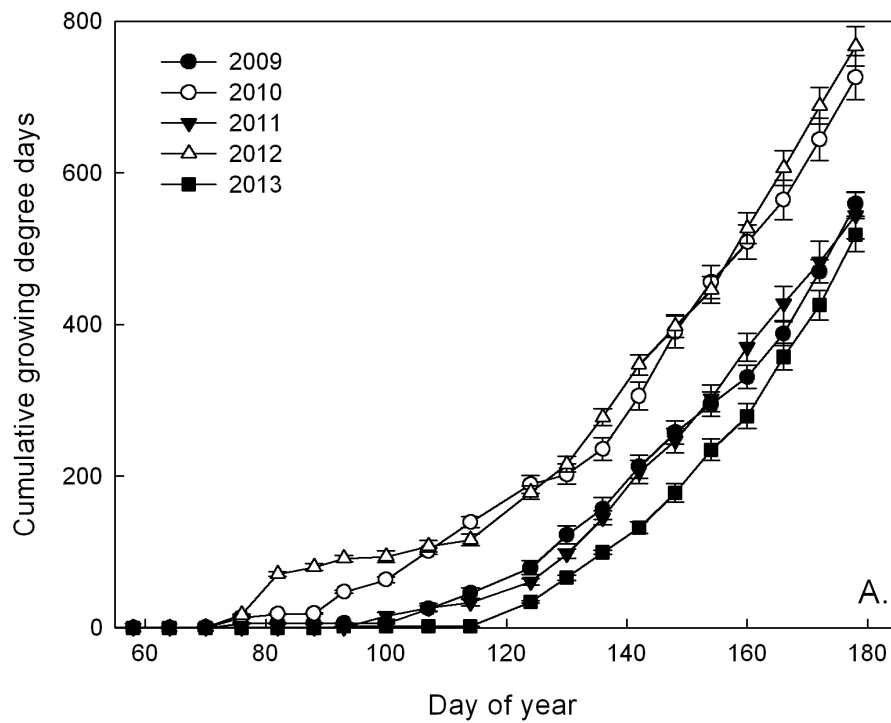

(B)

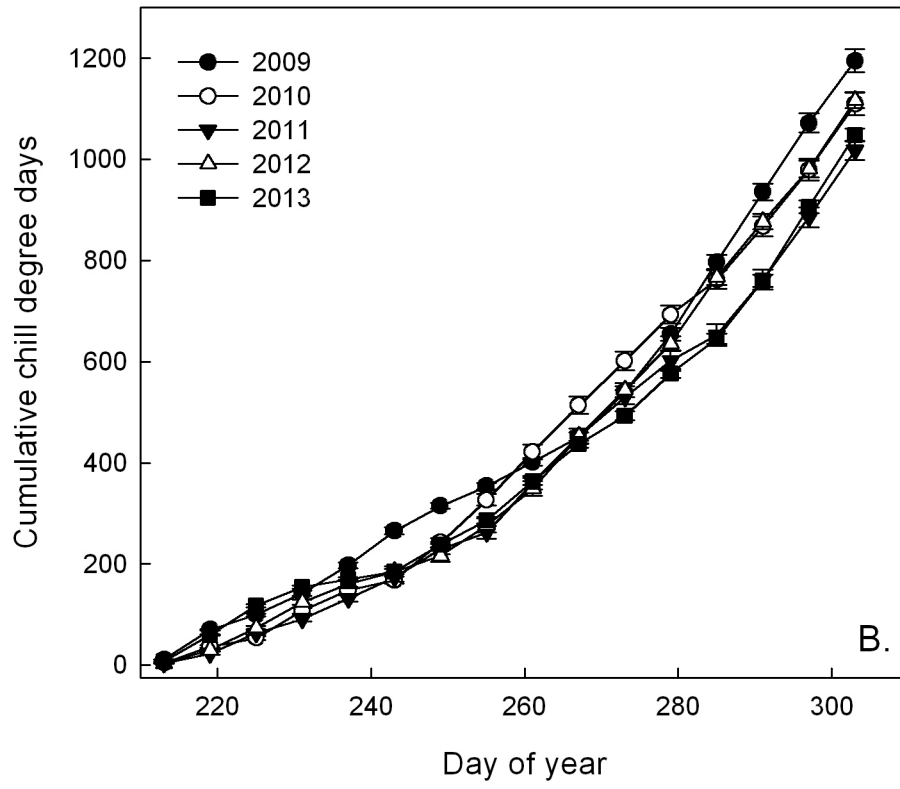

**Figure S2.** Average difference in budburst for saplings of ten tree species grown under ambient and elevated (+3.4 °C) temperatures. Left five species are considered temperate and right five are boreal. Each panel depicts a unique year. Error bars are standard error across plots (N=12).

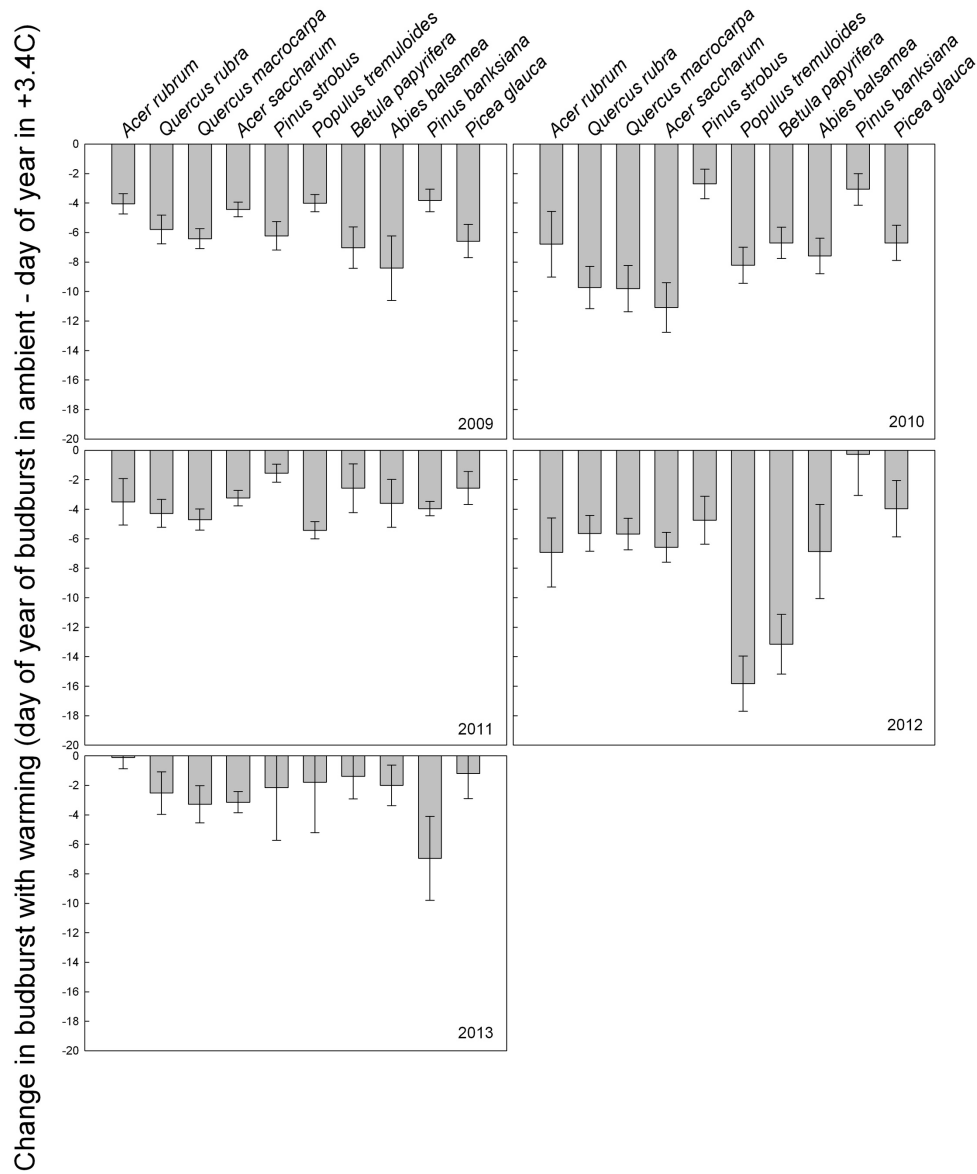

**Figure S3.** Average difference in day of year of start of senescence for saplings of ten tree species grown under ambient and elevated (+3.4 °C) temperatures. Left five species are considered temperate and right five are boreal. Each panel depicts a unique year. Error bars are standard error across plots (N=12).

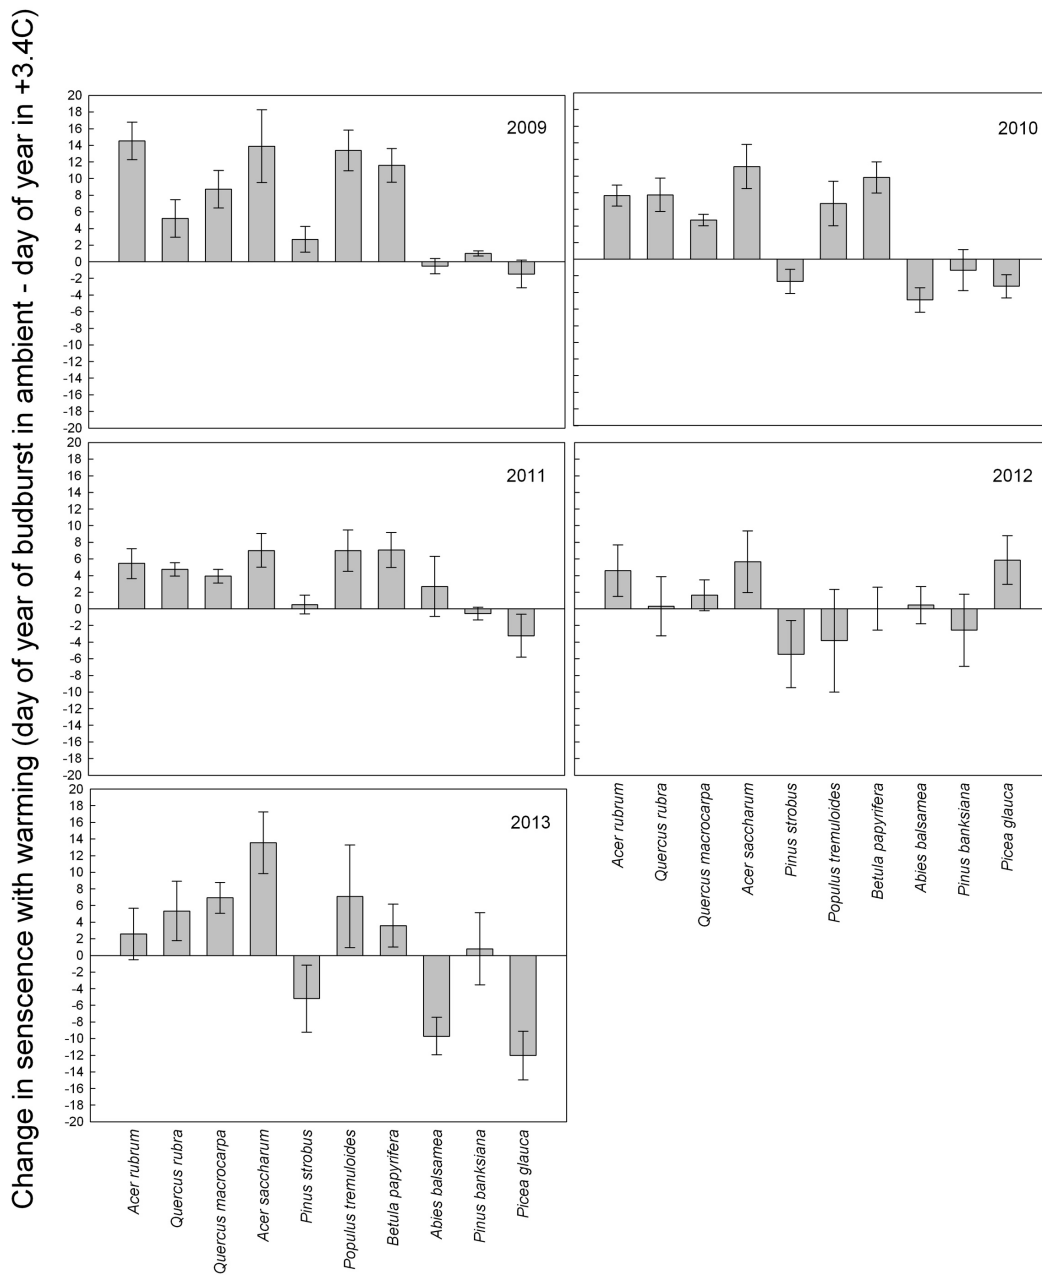

**Figure S4.** Average changing in growing season length for saplings of six tree species grown under ambient and elevated (+3.4 °C) temperatures. Each panel depicts a unique year. Error bars are standard error across plots (N=12).

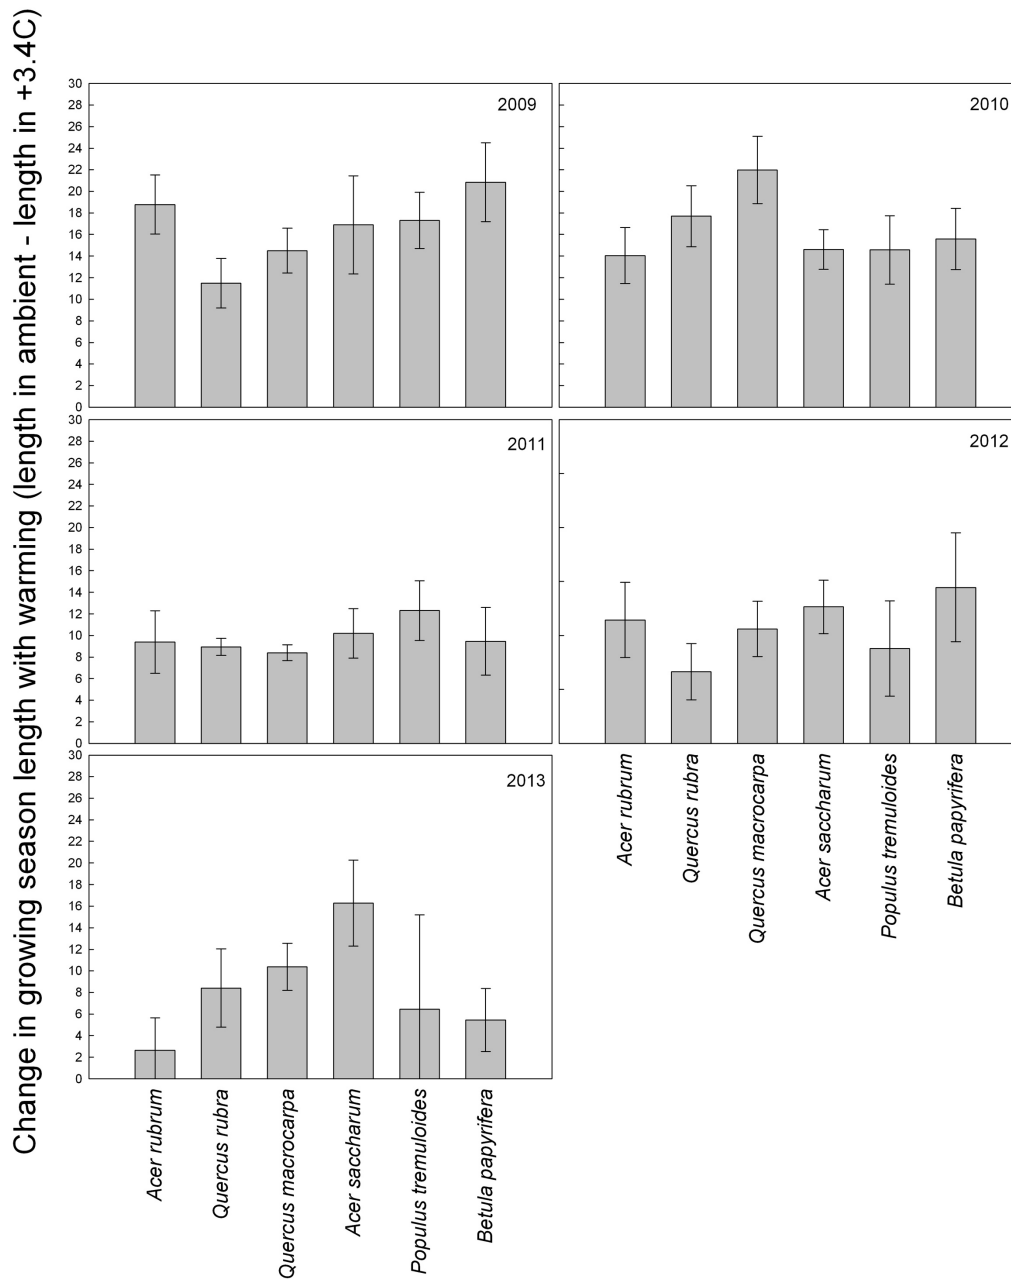

Supplement: pnas.1917508117.sapp.pdf [file pnas.1917508117.sapp.pdf]
